# Supplementary material for: Elucidating the information exchange during interfacility care transitions: Insights from a Qualitative Study
Source: PubMed Central journal article supplement — BMJ Open. 2017 Jul 12;7(7):e015400. doi: 10.1136/bmjopen-2016-015400 (PMC5734419; doi:10.1136/bmjopen-2016-015400), 2017-07-12
Supplement: bmjopen-2016-015400.draft_revisions.pdf [file bmjopen-2016-015400.draft_revisions.pdf]

# BMJ Open

## Elucidating the Information Exchange during Inter-facility Care Transitions: Insights from a Qualitative Study

|                                 |                                                                                                                                                                                                                                                                                                                                                                                                                                                                                                         |
|---------------------------------|---------------------------------------------------------------------------------------------------------------------------------------------------------------------------------------------------------------------------------------------------------------------------------------------------------------------------------------------------------------------------------------------------------------------------------------------------------------------------------------------------------|
| Journal:                        | <i>BMJ Open</i>                                                                                                                                                                                                                                                                                                                                                                                                                                                                                         |
| Manuscript ID                   | bmjopen-2016-015400                                                                                                                                                                                                                                                                                                                                                                                                                                                                                     |
| Article Type:                   | Research                                                                                                                                                                                                                                                                                                                                                                                                                                                                                                |
| Date Submitted by the Author:   | 09-Dec-2016                                                                                                                                                                                                                                                                                                                                                                                                                                                                                             |
| Complete List of Authors:       | <p>Jeffs, Lianne; St Michael's,<br/> Saragosa, Marianne; St Michael's, Nursing Research<br/> Law, Madelyn; Brock University, Community Health Sciences<br/> Kuluski, Kerry; University of Toronto, Institute of Health Policy,<br/> Management &amp; Evaluation; Lunenfeld-Tanenbaum Research<br/> Institute, Bridgepoint Collaboratory for Research and Innovation<br/> Espin, Sherry; Faculty of Community Services, Ryerson University<br/> Merkley, Jane; Mount Sinai Hospital<br/> Bell, Chaim</p> |
| <b>Primary Subject Heading</b>: | Qualitative research                                                                                                                                                                                                                                                                                                                                                                                                                                                                                    |
| Secondary Subject Heading:      | Health policy, Health services research, Nursing, Qualitative research                                                                                                                                                                                                                                                                                                                                                                                                                                  |
| Keywords:                       | QUALITATIVE RESEARCH, Quality in health care < HEALTH SERVICES ADMINISTRATION & MANAGEMENT, GERIATRIC MEDICINE                                                                                                                                                                                                                                                                                                                                                                                          |
|                                 |                                                                                                                                                                                                                                                                                                                                                                                                                                                                                                         |

SCHOLARONE™  
Manuscripts

Only

1  
2  
3 **Title:** Elucidating the Information Exchange during Inter-facility Care Transitions:  
4  
5 Insights from a Qualitative Study  
6  
7

8  
9 **Corresponding author:**

10 Lianne Jeffs, RN, PhD, FAAN

11 St. Michael's Hospital Volunteer Association Chair in Nursing Research

12 Li Ka Shing Knowledge Institute

13 209 Victoria St – Room 720

14 Toronto ON M5B 1T8

15 Email: jeffsl@smh.ca

16 Tele: 416-864-6060, ext 77644  
17  
18  
19  
20  
21  
22  
23  
24  
25  
26  
27

28 **Co-Authors:**

- 29  
30 1. Marianne Saragosa, St. Michael's Hospital, Toronto Canada  
31 2. Madelyn Law, Department of Health Science, Brock University, St. Catherine's  
32 Canada  
33 3. Kerry Kuluski, Lunenfeld-Tanenbaum Research Institute, Sinai Health System  
34 Toronto Canada  
35 4. Sherry Espin Daphne Cockwell School of Nursing, Ryerson University Toronto  
36 Canada  
37 5. Jane Merkle Sinai Health System Toronto Canada  
38 6. Chaim M. Bell Sinai Health System Toronto Canada  
39  
40

41 **Keywords:** continuity of care, older patients, care transitions, qualitative research

42 **Word count:** 4,534  
43  
44  
45  
46  
47  
48  
49  
50  
51  
52  
53  
54  
55  
56  
57  
58  
59  
60

## Abstract

**Objective** to explore the perceptions of patients, their caregivers, and health care professionals associated with the exchange of information during transitioning from two acute care hospitals to one rehabilitation hospital.

**Design** An exploratory qualitative study using semi-structures interviews and observation.

**Participants and setting** Patient over the age of 65 admitted to an orthopedic unit for a non-elective admission, their caregivers, and health care professionals involved in their care. Participating sites included orthopedic inpatient units from two acute care teaching hospitals and one orthopedic unit at a rehabilitation hospital in a downtown urban setting.

**Findings** Three distinct themes emerged from participants' narrative of their transitional care experience: 1) having no clue what the care plan is; 2) being told and notified about the plan; and 3) experiencing challenges absorbing information. Participating patients and their caregivers reported not being engaged in an active discussion with health care professionals about their care transitions plan. Several health care professionals described withholding sharing the plan until they themselves knew where the patient was going to and what would be happening next.

**Conclusion** This study highlights the need for further efforts to ensure effective information exchanges are occurring with patients and their caregivers as they transition from acute care hospital to rehabilitation settings.

## Article Summary

### Strengths and limitations of this study

- This study explores the understudied area of the perceptions of patients, their caregivers, and health care professionals associated with the exchange of information during transitioning from two acute care hospitals to one rehabilitation hospital
- The study was only conducted with non-elective orthopedic patients and their caregiver at two acute care teaching hospitals and one rehabilitation hospital in an urban setting in Canada. Thus, our findings may not be transferrable to other geographical locations or other patient populations (e.g. medically complex patients without orthopedic injury)
- There is a potential for social desirability bias when conducting interviews with participants

## Elucidating the Information Exchange during Inter-facility Care Transitions: Insights from a Qualitative Study

### INTRODUCTION

It is well established that care transitions points present potential for threats to safety and quality.[1] These threats can result in harm to patients,[2] an increased risk of readmission,[3] increased length of stay,[4] and economic burden to the health care system and patients and their families.[5] Underpinning these threats often is deficits in communication and inadequacies in exchange of information around discharge home from hospital[1, 6] or transfer to another health care facility.[2, 7, 8] Poor information exchange often includes inaccurate or missing information regarding patients current health status, medication plan, functional and psychological history and unresolved plans for follow-up care post discharge or transfer from a hospital to another facility.[4, 7] Patients and their caregivers (e.g., family) may then be uninformed or misinformed about their illness and medications and not be able to carry out the care transitions plan or manage their own health.[9]

The exchange and transfer of accurate and complete information to patients and their caregivers around what is currently happening and what to expect next is an important component of ensuring quality care transitions.[8, 10, 11] By providing information to patients (and when available their caregivers) they are more informed and have the potential to actively participate in their care[8] which is associated with improved patient satisfaction and clinical outcomes.[12] However, varying degrees of information exchange with patients[13] and their subsequent participation in their care planning[11, 14] have been reported. The information exchange between acute care

1  
2  
3 hospitals to rehabilitation settings has received less attention in the literature as compared  
4  
5 to those discharged home from the hospital.[7,8,15] Minimal evidence exists around the  
6  
7 nature of the information exchange[15] including the patients' (and when available  
8  
9 caregivers') desire for information.[8] Insight is needed around the nature of information  
10  
11 exchange with patients as they transition from acute care hospital to rehabilitation  
12  
13 settings, as these patients are potentially more vulnerable and their medical conditions  
14  
15 more active than for patients discharged home.[15] Further this exchange of information  
16  
17 often forms the basis for admission orders in the rehabilitation setting influencing  
18  
19 subsequent transitions in care.[15] In this context, a study was undertaken to explore the  
20  
21 perceptions of patients, their caregivers, and health care professionals associated with the  
22  
23 exchange of information during transitioning from two acute care hospitals to one  
24  
25 rehabilitation hospital.  
26  
27  
28  
29  
30

## 31 **METHODS**

32  
33  
34 This study employed an exploratory qualitative design to gain insight into the  
35  
36 perceptions and experiences associated with care transitions of non-elective patients 65  
37  
38 years and older, caregivers, and health care professionals being transferred out of the  
39  
40 acute care hospital to a rehabilitation facility. Non-elective patients did not expect to be  
41  
42 admitted to hospital and therefore had no planning for transfer to another setting from  
43  
44 hospital or discharge to home. Ethics approval was obtained at all of the participating  
45  
46 institutions (two acute care hospitals and one rehabilitation hospital). Funding was  
47  
48 received by the Ontario Ministry of Health and Long Term Care (Grant Number: 06693).  
49  
50  
51

### 52 **Setting**

1  
2  
3  
4  
5  
6  
7  
8  
9  
10  
11  
12  
13  
14  
15  
16  
17  
18  
19  
20  
21  
22  
23  
24  
25  
26  
27  
28  
29  
30  
31  
32  
33  
34  
35  
36  
37  
38  
39  
40  
41  
42  
43  
44  
45  
46  
47  
48  
49  
50  
51  
52  
53  
54  
55  
56  
57  
58  
59  
60

Participating sites included orthopedic inpatient units from two acute care teaching hospitals and one orthopedic unit at a rehabilitation hospital in a downtown urban setting. Our study targeted patients 65 years and older who had undergone a non-elective admission (e.g. a patient who had fallen or had an accident that had sustained a fracture) their family member (referred to here within as caregiver), and health care professionals (physicians, nurses, nurse practitioners, physiotherapists, occupational therapists, pharmacists and social workers).

### **Recruitment and Data Collection Process**

A purposeful sampling strategy was employed whereby study participants who met the eligibility criteria (see Box 1) were identified and approached face-to-face by a research coordinator (MS).[16] The research coordinator was a Master's prepared nurse with extensive experience in qualitative research. Eligible patients, who were unknown to the research coordinator prior to study commencement, were provided an overview of the study and the research coordinator then obtained consent from those patients willing to participate. Once the patient was enrolled, the research coordinator approached caregivers at the participating sites for involvement in the study. Caregivers were provided an overview of the study and then the research coordinator obtained their consent. Health professionals were recruited from the participating units by the research coordinator. For those who agreed, the research coordinator provided an overview of the study and then obtained consent from willing participants. Patient and caregiver interviews took place at

1  
2  
3 the rehabilitation facility following the transfer from the acute care hospital. Most  
4  
5  
6 interviews conducted were face-to-face; however, for several caregivers, interviews took  
7  
8  
9 place over the phone for convenience.  
10

11  
12 Health care professionals were informed of the study by their respective unit  
13  
14 managers. Members of the interprofessional team were selected based on their direct  
15  
16 involvement in the care transition of the study patient at either the acute care or  
17  
18 rehabilitation site. Those involved were approached face-to-face by the research  
19  
20 coordinator who then provided an overview of the study and obtained informed consent  
21  
22 prior to conducting the interview. Health care professionals consisted of nurses, social  
23  
24 workers, occupational therapists, physical therapists, pharmacists, physicians, and unit  
25  
26 managers. Health care professionals were interviewed face-to-face either at the acute care  
27  
28 site and the rehabilitation site following the transition of the patient.  
29  
30  
31  
32  
33  
34  
35  
36  
37  
38  
39

40 **Box 1**

41  
42 Patient: 65 and older; able to comprehend English and provide consent; and non-elective  
43 orthopedic patient being transferred to specific rehabilitation facility  
44

45  
46 Caregiver: caregiver of non-elective patient being transferred to specific rehabilitation  
47 facility who is 65 and older and able to comprehend English and provide consent  
48

49  
50 Health care professional: health care professionals at the acute care hospital or  
51 rehabilitation facility and able to comprehend English and provide consent and  
52 provided care the patients who were recruited for the study.  
53

54  
55 Semi-structured interview guides were used with study participants to elicit their  
56  
57 perceptions and experiences associated with the care transitions of non-elective medically  
58  
59  
60



1  
2  
3 complex patients 65 and older. The interview guides were developed from a realist  
4 review and Delphi panel detailed in a separate paper. [17] Pilot testing of the interview  
5 guide occurred with the first few participants with additional prompts made to the  
6 interview guides. Patients and caregivers were interviewed after they transitioned from  
7 the rehabilitation hospital from the acute care and where possible prior to being  
8 discharged home from the rehabilitation organization. This occurred in six incidences  
9 where patients or their caregiver were interviewed either shortly before or after discharge  
10 home. Health care professions were interviewed at one time. All interviews were audio  
11 recorded and transcribed verbatim by a professional transcriptionist. Field notes were  
12 taken by the research coordinator following the interview and shared with the research  
13 team. Duration of interviews averaged between 6 and 60 minutes. The shortest interview  
14 at 6 minutes was the result of the participant being called away to attend to patient care.  
15 Participants completed a short demographic questionnaire prior to the start of the  
16 interview. Data saturation occurred once data findings were noticeably redundant despite  
17 new participants.

### 38 **Data analysis**

39  
40 Directed content analysis was used to analyze the transcribed interviews.[18] A  
41 line or two to describe directed content analysis. Each transcript was individually  
42 reviewed and coded by the principal investigator (PI) and two research staff.  
43 Simultaneous and iterative coding occurred with the patient, caregiver and health care  
44 professionals. The initial coding schema, derived from the data, was developed once  
45 consensus was met between the coders. The codes were combined into categories that  
46 were further refined into themes by the PI and two research staff. As a final step to ensure  
47  
48  
49  
50  
51  
52  
53  
54  
55  
56  
57  
58  
59  
60

1  
2  
3 methodological rigor, the PI reviewed all of the original transcripts with the emergent  
4 coding schema to ensure all codes and categories had been captured from the transcripts  
5  
6 in the final coding schema.[16]  
7  
8  
9

## 10 RESULTS

### 11 Participant characteristics

12  
13  
14  
15 In total, 15 patients from an orthopedic unit who met the eligibility criteria were  
16 identified and 13 patients consented to participate. Two were screened and found to be  
17 ineligible with one patient subsequently transferred to a non-rehabilitation unit and the  
18 other presented with cognitive deficits. Patient participants were mostly female (n = 9 or  
19 69%) with 4 males (31%). The patients had an average age of 82.9 years with a range  
20 from 68 to 91. The patients had on average 5.4 morbidities (e.g. Parkinson's disease,  
21 chronic obstructive pulmonary disease, hypertension), which ranged from 2 to 16. All  
22 patients lived alone with the exception of one patient who lived with a spouse. The  
23 patients were prescribed on average 8.5 medications with a range of 5 to 17 medications.  
24 Of the 13 patients who were enrolled in the study, nine caregivers (n=9) were recruited  
25 and enrolled in the study. Caregiver participants reported an average age of 63.1 years,  
26 which ranged from 51 to 89 years. All caregivers were female with seven being adult  
27 children, one was a spouse, and one was a sibling. Duration of caregiver role in years was  
28 6.25 on average, with a range of 1 to 20 years.  
29  
30  
31  
32  
33  
34  
35  
36  
37  
38  
39  
40  
41  
42  
43  
44  
45  
46  
47

48 In total, 50 health care professionals participated in an interview with 29 (58%)  
49 nurses, 6 (12%) pharmacists, 8 (16%) physical therapists, 3 (6%) social workers, 2 (4%)  
50 occupational therapists, 1 (2%) patient care manager, and 1 (2%) physician. Seventy-  
51 eight percent were female (n=39), while 22% were male (n=11). Years of experience  
52  
53  
54  
55  
56  
57  
58  
59  
60

1  
2  
3 varied from less than 1 year reported in three participants (6%), to between 2 and 5 years  
4  
5 in 14 participants (28%), between 6 and 10 years in 6 participants (12%), between 11 and  
6  
7 15 in 12 participants (24%), and 15 (30%) participants reported more than 16 years of  
8  
9 experience. Most of the HCPs reported working full-time (n=39, 78%) compared to part-  
10  
11 time (n=11, 12%). The highest degree obtained by participants was university degrees  
12  
13 (n=24, 48%), followed by graduate degrees (n=17, 34%), and the remaining completed a  
14  
15 college degree (n=9, 18%). One HCP approached for the study refused to participate  
16  
17 because of concerns related to anonymity.  
18  
19  
20  
21

## 22 FINDINGS

23  
24 The following three themes emerged from the interviews: having no clue what the  
25  
26 care plan is; being told and notified about the plan; and experiencing challenges  
27  
28 absorbing information.  
29  
30

### 31 *Having no clue what the care plan is*

32  
33 This theme reflects how several patients and their caregivers experienced care  
34  
35 transitions across the acute to rehabilitation hospital spectrum, while not knowing what  
36  
37 their care plan was. Several participants described not having a clue about their care plan.  
38  
39 Caregiver and patient experiences ranged from receiving “*tidbits of information*” to “*no*  
40  
41 *information*” and “*leaving without a plan*” around what was going on and where and  
42  
43 when the patient was being transferred. As a result, some caregivers described not  
44  
45 knowing what to expect at the rehabilitation hospital. For example, one caregiver  
46  
47 described being “*plunked*” in the hospital with a package of follow-up appointments  
48  
49 provided (referred to as envelope, paper and list by participants) but this was not  
50  
51 explained and information about the transitions plan was not provided. A few health care  
52  
53  
54  
55  
56  
57  
58  
59  
60

1  
2  
3 professionals acknowledged that they either did not know if the plan had been  
4  
5 communicated to patients and their caregivers. This theme is illustrated in the following  
6  
7 quotes:  
8  
9

10 *I just assume that somewhere along the way I was going to get out. Then it was*  
11 *one day, you're going tomorrow and I thought, really? Already? And off we*  
12 *went. I don't recall anyone saying, when you get there, you can expect this to be*  
13 *different or that to be the same or ... it was just, okay, now is the time and off you*  
14 *go. (patient hospital site 2)*  
15  
16

17 *I was given a package with her follow-up appointments in it but it wasn't*  
18 *explained to me. So I have no clue - How does she get there? Is anything*  
19 *happening over the weekend? Is it starting on Monday? What's going to*  
20 *happen? No information. We've just been plunked here with no information.*  
21 *(caregiver hospital site 1)*  
22  
23

24 *It was to my surprise yesterday, that I received a call from one of her visitors*  
25 *telling me that your mom is going to Hospital-X tomorrow and that she needs*  
26 *clothes. I think that I should have received a more formal call from somebody*  
27 *with the plan. There are questions, little tidbits of information I have received, i.e.*  
28 *mom's current drugs that she's taken. So apparently that's being changed...I*  
29 *don't know the outcome of anything so I don't know the plan except that she's*  
30 *here now at Hospital-X. (caregiver hospital site 2)*  
31  
32  
33

34 *They have a discharge list, a little envelope that the patients get. I'm not sure that*  
35 *they go through all of that with the patient. I think it probably varies. I don't*  
36 *know. I'm going to guess that some nurses are really good and go over it in*  
37 *detail, and I think others just say, here's your envelope, goodbye. (physician*  
38 *rehabilitation hospital)*  
39  
40  
41

42 Caregivers also described that they would have to wait to connect with health care  
43  
44 professionals to engage in a conversation around the care transitions plan and goals for  
45  
46 their family member who was a patient. In some cases, caregivers questioned whether  
47  
48 there was a plan in place that had not been communicated to them or their family member  
49  
50 who was the patient. A few health care professionals described withholding sharing the  
51  
52 plan until they themselves knew where the patient was going to and what would be  
53  
54 happening next. For some participants when they did speak to health care professionals  
55  
56  
57  
58  
59  
60

1  
2  
3 they described receiving information around the immediate status of their family member  
4  
5 who was a patient but minimal to no information about the follow-up plan. One caregiver  
6  
7 described that the health care professionals were “*dealing with the stage you are at*” and  
8  
9 one health care professional described “*being focused on doing the rehab part*”. The  
10  
11 following narrative examples elucidate this theme.  
12  
13

14  
15 *No one has spoken to me or to my mother about the goal. No one's talked about a*  
16 *deadline or time period, which they tell you in the booklet they will. So I keep*  
17 *waiting for someone to call me so we can sit down and talk about this. I still have*  
18 *no idea how long my mother will be here. It seems that they deal with the stage*  
19 *you're at. Hospital-X was an acute care, just to deal with the pain management,*  
20 *to start physiotherapy and this is the next stage in the physiotherapy, more intense*  
21 *physiotherapy. In terms of follow up or whether there will be follow up, nothing.*  
22 *In terms of being put in communication as to where my mother is going, there's*  
23 *been no connection whatsoever. (caregiver hospital site 1)*  
24  
25

26  
27 *I think families and patients have expectations that they want to go to a certain*  
28 *rehab facility, but that doesn't always happen. I don't know if that is always*  
29 *carried out clearly to the patient and their respective family members. I would say*  
30 *I don't tell them consistently ... I would tell them if they asked me and it doesn't*  
31 *come up naturally. (occupational therapist hospital site 1)*  
32  
33

### 34 ***Being told and notified about the plan***

35  
36 This theme captures how some patients and their caregivers were informed about  
37  
38 their plan for care transitions. Experiences of being informed of the care transitions plan  
39  
40 mainly were passive in nature in that health care professionals told or notified and  
41  
42 explained the plan to patients and/or their caregivers. For some participants, health care  
43  
44 professionals explained what was going on and where the patients were going with the  
45  
46 patients and their caregivers. This often included telling the patients and caregivers  
47  
48 information about follow-up appointments, expectations about their recovery and therapy  
49  
50 to where they were being transferred to and discharged home, and in some cases  
51  
52 equipment that will be required once discharged home. Patients and caregivers did not  
53  
54  
55  
56  
57  
58  
59  
60

1  
2  
3 report being engaged in an active discussion with health care professionals about their  
4  
5 care transitions plan. For example, one caregiver and patient described being “well  
6  
7 informed all the time” but not being involved in a discussion with the health care  
8  
9 professionals about their care transitions plan. Often patients and caregivers were  
10  
11 comfortable with the passive nature of information exchange as they felt that the health  
12  
13 care team knew what they were doing and would connect with patients and their  
14  
15 caregivers at their discretion when required. This theme is further illustrated in the  
16  
17 following quotes:  
18  
19  
20  
21

22 *Hospital-X did a really, really good job of keeping all of us informed and relaying*  
23 *whatever information they had, they would give it. I certainly knew all that was*  
24 *going on. I was well aware of the process. (patient hospital site 1)*  
25  
26

27 *It was more just us expressing our recommendations, and the patient agreeing,*  
28 *and then we moved forward with the plan just by submitting it. So I think,*  
29 *probably the patient’s role is also minimal once we’ve determined, yes, rehab is*  
30 *the plan. So other than consenting and choosing his preferences, I think their*  
31 *involvement in transitioning from here to rehab is also probably minimal.*  
32 *(physiotherapist hospital site 1)*  
33  
34

35 *Most of the time, the patient comes here, they’re expecting to have their lives*  
36 *back, to do whatever they do before this fracture, these things happened. Now that*  
37 *you ask it, some of the patients don’t know what the expectation is from after*  
38 *surgery and going to a different facility. Because they think that’s like when you*  
39 *have hip surgery or something like that, they only stay for 24 hours and then go to*  
40 *another facility. But those patients that are first time, seriously they don’t know.*  
41 *So that’s why when they come here, we have to explain. (nurse rehabilitation*  
42 *hospital).*  
43  
44

45 *It was all in the folder that she got, and I was reading through it before we even*  
46 *left the hospital. I knew what to expect when we left the hospital. I knew*  
47 *everything ahead of time so I was up on all of it because the appointments and*  
48 *everything that were scheduled for her were all in the envelope. Everything was*  
49 *there, and it was all well put together. (caregiver hospital site 1, discharge*  
50 *interview)*  
51  
52  
53

#### 54 ***Experiencing challenges absorbing the information***

55  
56  
57  
58  
59  
60

1  
2  
3 This third theme elucidates a group of patients that were experiencing challenges  
4 absorbing the information that was provided to them about their care transitions plan.  
5  
6 Challenges absorbing the information were often associated with the patients being  
7  
8 “quite medicated” and “drugged up” or experiencing symptoms (e.g. pain and  
9  
10 constipation) that interfered with their ability to understand the information. The fast pace  
11  
12 of recovering from a non-elective injury and “getting bombarded” with a number of  
13  
14 health care professionals was also reported by patients and their caregivers. In turn, this  
15  
16 pace and number of interactions with health care professional was perceived as  
17  
18 contributing to patients not being able to remember and absorb information about what  
19  
20 was happening and their care transitions plan. A The following excerpts are examples of  
21  
22 this theme:  
23  
24  
25  
26  
27  
28

29  
30 *I have to say that, while I was at Hospital-X, I was quite heavily medicated*  
31 *because of just having had the hip replacement done. I wouldn't have had a clue*  
32 *what was happening about half the time, not because people weren't telling me*  
33 *but just because I wouldn't have been able to keep up with them. (patient hospital*  
34 *site 2) ... As mom says, things were coming like a train down a track. Everything*  
35 *was moving at high speed. There is important information that is coming to you*  
36 *all of the time and it's coming at you fast and furious. (caregiver hospital site 2)*  
37  
38

39  
40 *I think when our nurse practitioner and case manager speaks to family or a*  
41 *patient about the next step in their plan. I'm sure they are being conveyed, but*  
42 *sometimes, when everything is happening so quickly, a patient might have*  
43 *forgotten what is going on or the family might be a little bit confused.*  
44 *(occupational therapist hospital site 1)*  
45

46  
47 *It's a little bit hard in the first day because they either travelled, they're tired,*  
48 *they're in pain, so they're not quite there and they get bombarded with everyone*  
49 *talking to them on the first day. (pharmacist rehabilitation hospital)*  
50

51  
52 *But Mom, I don't think was in any position to absorb the amount of information*  
53 *and the decision making. They can't just flit in and out of her bedroom with tons*  
54 *of information and expect her to retain it. (caregiver hospital site 2)*  
55

## 56 DISCUSSION

57  
58  
59  
60

1  
2  
3 Our findings elucidate the nature of exchange of information amongst patients  
4 and their caregivers with health care professionals during transitions from acute care  
5 hospital to rehabilitation settings. The three emergent themes findings add to the growing  
6 body of literature regarding information exchange during care transitions from acute care  
7 hospital to rehabilitation settings.  
8  
9  
10  
11  
12  
13

14  
15 In our study, patients, caregivers, and to a lesser extent health care professionals  
16 described the challenges patients experienced in absorbing information about their plan  
17 for transitions to the rehabilitation setting. Patients, caregivers and health care  
18 professionals attributed these challenges to high levels of medication and being  
19 approached by too many people in a short period of time. Such things impacted patients  
20 ability to understand or remember what information had been shared with them. This  
21 frustration associated with complexity and timing of discharge information has also been  
22 highlighted in research focused on discharge home from hospital.[9] Similar to Coleman  
23 et al's (2013) findings,[2] the volume of information and number of interactions with  
24 health care professions conveyed in a short period of time presented significant  
25 challenges to patients being able to absorb and retain the information around their care  
26 transitions plan.  
27  
28  
29  
30  
31  
32  
33  
34  
35  
36  
37  
38  
39  
40  
41  
42

43 The experience of not knowing the plan and confusion about next steps (having  
44 no clue) was consistent with what has been reported in other studies.[7, 8, 12, 19, 20, 21].  
45  
46 Our finding of patients and their caregivers having tidbits of or no information is in line  
47 with other studies, For example, one study reported that as patients transferred from the  
48 hospital to a rehabilitation setting they received very little information about what  
49 happened to them and when they did it was typically unstructured or insufficiently  
50  
51  
52  
53  
54  
55  
56  
57  
58  
59  
60



1  
2  
3 explained.[8] Likewise, another study reported that patients and caregivers did not  
4  
5 receive the needed information about the reasons for their transfers to hospitals, medical  
6  
7 diagnoses and planned treatments, resulting in lack of awareness of both their change in  
8  
9 health status and transition plan.[19] In our study, lack of information resulted in  
10  
11 confusion for patients and caregivers and no guidance on how to navigate post transfer  
12  
13 from the hospital. In another study, more than one third of patients could not clearly  
14  
15 describe their diagnosis and less than half could recall follow up appointments that had  
16  
17 been made for them.[21]  
18  
19  
20  
21

22 In our study, several patients and caregivers were waiting to find out information  
23  
24 from the healthcare team. The desire to connect with health care professionals to get  
25  
26 more information about their care transitions plan was reported in a study involving  
27  
28 elderly patients and their caregivers.[19] However, similar to our study, others have  
29  
30 reported not talking to anyone about their post-discharge care.[12] In our study, when  
31  
32 information exchange did happen between patients and their caregivers with health care  
33  
34 professionals, the exchange was often passive (e.g. patients and caregivers were told,  
35  
36 informed, notified) and focused on the immediate status or stage the patient was at  
37  
38 compared to the overall plan for transitions from the hospital to the rehabilitation hospital  
39  
40 to eventually being discharged home or to a long-term care facility. The finding that  
41  
42 some patients and caregivers were being told about their care transitions plan (compared  
43  
44 to being actively engaged) is consistent with other studies that described patients and  
45  
46 caregivers as satisfied with the nature of information exchange [11] and not viewing it  
47  
48 necessary to obtain more information than what was provided.[8]  
49  
50  
51  
52  
53  
54  
55  
56  
57  
58  
59  
60

1  
2  
3 Our study findings elucidate the need for further efforts to ensure effective  
4 information exchanges are occurring with patients and their caregivers as they transition  
5 from acute care hospital to rehabilitation settings. Providing information to patients and  
6 their caregivers in a timely fashion and with consistent health care professionals is  
7 essential to ensure that they understand the information provided to them. Patients and  
8 caregivers should be kept thoroughly informed throughout the various care transitions  
9 points.[20] Health care professionals need to ascertain what information the patient and  
10 caregiver want to know and when and how and when to best to convey this relevant  
11 information to ensure adequate understanding of and carrying out of their care transitions  
12 plan.[7] Furthermore, health care professionals need to determine whether patients and  
13 caregivers prefer to be passively or actively involved in their care transitions  
14 planning.[14]

15  
16  
17  
18  
19  
20  
21  
22  
23  
24  
25  
26  
27  
28  
29  
30  
31  
32 Recently in Ontario, the implementation of a Patient-Oriented Discharge  
33 Summary (PODS) tool with a variety of patient populations being discharged from  
34 hospital to home has shown that the majority of patients who receive PODS have an  
35 improved understanding of their discharge instructions.[22,23] This tool could be adapted  
36 to be used to ensure accurate, timely and relevant information is exchanged during inter-  
37 facility transitions of care. Further, promising signs are being observed with teach back  
38 methods whereby patients are provided information about the care transitions plan  
39 including where the patient is going to by health care professionals and are then asked to  
40 share what information has been provided to them.[1, 21] This strategy allows for the  
41 health care professional to verify the patients' (and when present the caregiver(s))  
42 understanding of the care transitions plan and correct any misinterpretations.[19] Finally,  
43  
44  
45  
46  
47  
48  
49  
50  
51  
52  
53  
54  
55  
56  
57  
58  
59  
60

1  
2  
3 the Registered Nurses Association of Ontario's Care Transitions Best Practice Guidelines  
4 provides a series of evidence and expert informed recommendations to ensure effective  
5 information exchange between patients, their caregivers and health care professionals  
6 occurs during care transitions that can be used as a blueprint for action.[24, 25]  
7  
8  
9  
10  
11

12 Our study findings need to be viewed with the following potential limitations.  
13 First, the study was only conducted with non-elective orthopedic patients and their  
14 caregiver at two acute care teaching hospitals and one rehabilitation hospital in an urban  
15 setting in Canada. Thus, our findings may not be transferrable to other geographical  
16 locations or other patient populations (e.g. medically complex patients without orthopedic  
17 injury). Second, there is a potential for social desirability bias when conducting  
18 interviews with participants. To mitigate this bias, the interview guide was carefully  
19 constructed to elicit patients', their caregivers', and professionals' perceptions and  
20 experiences associated with the care transitions from acute care hospital to a  
21 rehabilitation hospital.  
22  
23  
24  
25  
26  
27  
28  
29  
30  
31  
32  
33  
34  
35

## 36 CONCLUSION

37 Our study provides insight around the nature of information exchange with  
38 patients as they transition from acute care hospital to rehabilitation settings. Specifically,  
39 our study revealed that many patients and caregivers have little to no information about  
40 their plan and are waiting to get this information so they know what to expect. When  
41 patients and caregivers received information it was a passive exchange where they were  
42 told or notified of what was going on and what was next representing a more paternalistic  
43 as opposed to collaborative exchange. For some patients they had challenges absorbing  
44 the information provided due to being medicated, experiencing other symptoms, or being  
45  
46  
47  
48  
49  
50  
51  
52  
53  
54  
55  
56  
57  
58  
59  
60

1  
2  
3 approached by too many health care professionals. Future efforts are required to ensure  
4  
5 effective information exchanges are occurring with patients and their caregivers as they  
6  
7 transition from acute care to rehabilitation to ensure that information is not only shared  
8  
9 but discussed with patients and caregivers. Bi-directional exchange between  
10  
11 professionals, patients and where possible, caregivers will provide opportunities for all  
12  
13 parties to provide input into the plan, confirm understanding and expectations. Further,  
14  
15 choosing an appropriate time to share the information, where possible, when the patient is  
16  
17 most stable, will ensure a greater potential of information retention.  
18  
19  
20  
21  
22  
23  
24  
25  
26  
27  
28  
29  
30  
31  
32  
33  
34  
35  
36  
37  
38  
39  
40  
41  
42  
43  
44  
45  
46  
47  
48  
49  
50  
51  
52  
53  
54  
55  
56  
57  
58  
59  
60

1  
2  
3 **Contributorship statement:** LJ conceived and designed the study. MS, ML, KK and SE  
4  
5 planned and completed the analysis. LJ wrote the manuscript with revisions being made  
6  
7  
8 by MS, ML, KK, SE, JM and CMB. All authors read and approved of the final  
9  
10 manuscript.  
11

12 **Competing interests:** None declared.  
13

14  
15 **Funding:** This project was funded by the Ontario Ministry of Health and Long Term  
16  
17 Care.  
18  
19

20 **Data sharing statement:** No additional data are available.  
21  
22  
23  
24  
25  
26  
27  
28  
29  
30  
31  
32  
33  
34  
35  
36  
37  
38  
39  
40  
41  
42  
43  
44  
45  
46  
47  
48  
49  
50  
51  
52  
53  
54  
55  
56  
57  
58  
59  
60

## REFERENCES

1. Coleman EA, Chugh A, Williams MV, *et al.* Understanding and execution of discharge instructions. *Am J Med Qual* 2013;5:383-91
2. Coleman EA. Falling through the cracks: challenges and opportunities for improving transitional care for persons with continuous complex care needs. *J Am Geriatr Soc* 2003;51:549-55.
3. Olsen RM, Østnor BH, Enmarker I, *et al.* Barriers to information exchange during older patients' transfer: nurses' experiences. *J Clin Nurs* 2013;22:2964-73.
4. King BJ, Gilmore□Bykovskyi AL, Roiland RA, *et al.* The consequences of poor communication during transitions from hospital to skilled nursing facility: a qualitative study. *J Am Geriatr Soc* 2013;61:1095-102.
5. Burbach BE, Cohen MZ, Zimmerman LM, *et al.* Post-hospitalization transition to home: Patient perspectives of a personalized approach. *J Nurs Educ Pract* 2016;6:32-40.
6. Dossa A, Bokhour B, Hoenig H. Care transitions from the hospital to home for patients with mobility impairments: patient and family caregiver experiences. *Rehabil Nurs* 2012;37:277-85.
7. Jeffs L, Kitto S, Merkley J, *et al.* Safety threats and opportunities to improve interfacility care transitions: insights from patients and family members. *Patient Prefer Adherence* 2012;6:711-18
8. McKain S, Henderson A, Kuys S, *et al.* Exploration of patients' needs for information on arrival at a geriatric and rehabilitation unit. *J Clin Nurs* 2005;14:704-10.
9. Ford BK, Ingersoll-Dayton B, Burgio K. Care transitions experiences of older Veterans and their caregivers. *Health Soc Work* 2016;41:129-38.
10. Strahan EH, Brown RJ. A qualitative study of the experiences of patients following transfer from intensive care. *Intensive Crit Care Nurs* 2005;21:160-71.
11. Flink M, Öhlén G, Hansagi H, *et al.* Beliefs and experiences can influence patient participation in handover between primary and secondary care—a qualitative study of patient perspectives. *BMJ Qual Saf* 2012;21(Suppl 1):76-83.
12. Flacker J, Park W, Sims A. Hospital discharge information and older patients: do they get what they need?. *J Hosp Med* 2007;2:291-6.
13. Dyrstad DN, Laugaland KA, Storm M. An observational study of older patients' participation in hospital admission and discharge—exploring patient and next of kin perspectives. *J Clin Nurs* 2015;24:1693-706.
14. Swinkels A, Mitchell T. Delayed transfer from hospital to community settings: the older person's perspective. *Health Soc Care Community* 2009;17:45-53.
15. Gandara E, Moniz T, Ungar J, *et al.* Communication and information deficits in patients discharged to rehabilitation facilities: an evaluation of five acute care hospitals. *J Hosp Med* 2009;4:E28-E33.

16. Patton MQ. *Qualitative research and evaluation methods*. Thousand Oaks: California, 2002.
17. Jeffs L, Kuluski K, Law M, *et al*. Identifying effective nurse-led care transition interventions for older adults with complex needs using a structured expert panel. *Worldviews Evid Based Nurs*. 2016; In Press.
18. Hsieh HF, Shannon SE. Three approaches to qualitative content analysis. *Qual Health Res* 2005;15:1277-88.
19. Toles MP, Abbott KM, Hirschman KB, *et al*. Transitions in care among older adults receiving long-term services and supports. *J Gerontol Nurs* 2012;38:40-7.
20. Rustad EC, Furnes B, Cronfalk BS, Dysvik E. Older patients experiences during care transitions. *Pat Pref and Adher* 2016; 10:769-779.
21. Horwitz LI, Moriarty JP, Chen C, *et al*. Quality of discharge practices and patient understanding at an academic medical center. *JAMA Intern Med* 2013;173:1715-22.
22. Hahn-Goldberg S, Okrainec K, Huynh T, Abrams H, *et al*. Implementing patient oriented discharge summaries (PODS): A multi-site pilot across early adopter hospitals. Accepted to *Healthcare Quarterly*. 2015; In Press.
23. Hahn-Goldberg S, Okrainec K, Huynh T, *et al*. Co-creating patient-oriented discharge instructions with patients, caregivers, and healthcare providers. *J Hosp Med* 2015; 10:804-7.
24. Dusek B, Pearce N, Harripaul A, Lloyd M. Care transitions: A Systematic Review of Best Practices. *Journal of nursing care qual* 2015;30: 233-239.
25. Registered Nurses Association of Ontario. Care transitions Best Practice Guideline. [http://rnao.ca/sites/rnao-ca/files/Care\\_Transitions\\_BPG.pdf](http://rnao.ca/sites/rnao-ca/files/Care_Transitions_BPG.pdf) (accessed August 2016).

## Patient Characteristics

|                           |       |
|---------------------------|-------|
| Total                     | 13    |
| Sex                       |       |
| Female                    | 9     |
| Male                      | 4     |
| AGE                       |       |
| Average (Y)               | 82.9  |
| Range                     | 91-68 |
| CO-MORBIDITIES            |       |
| Average                   | 5.4   |
| Range                     | 2-16  |
| LIVING ARRANGEMENT        |       |
| Lives alone               | 12    |
| Lives with spouse/partner | 1     |
| MEDICATIONS               |       |
| Average                   | 8.5   |
| Range                     | 17-5  |

## Caregiver Characteristics

|                                     |       |
|-------------------------------------|-------|
| Total                               | 9     |
| SEX                                 |       |
| Female                              | 9     |
| AGE                                 |       |
| Average                             | 63.1  |
| Range                               | 51-89 |
| RELATIONSHIP TO PATIENT             |       |
| Child                               | 7     |
| Spouse                              | 1     |
| Sibling                             | 1     |
| DURATION OF CAREGIVER ROLE IN YEARS |       |
| Average                             | 6.25  |
| Range                               | 1-20  |



## Healthcare Professional Characteristics

|                              |         |
|------------------------------|---------|
| Total                        | 50      |
| Sex                          |         |
| F (%)                        | 39 (78) |
| M                            | 11 (22) |
| PROFESSIONAL BACKGROUND N, % |         |
| Nursing                      | 29 (58) |
| Pharmacy                     | 6 (12)  |
| Physical Therapy             | 8 (16)  |
| Social Work                  | 3 (6)   |
| Occupational therapy         | 2 (4)   |
| Medicine                     | 1 (2)   |
| Management                   | 1 (2)   |
| YEARS OF EXPERIENCE          |         |
| <1 Year (%)                  | 3 (6)   |
| 2-5 years (%)                | 14 (28) |
| 6-10 years (%)               | 6 (12)  |
| 11-15 years (%)              | 12 (24) |
| >16 years (%)                | 15 (30) |
| PLACE OF EMPLOYMENT N, %     |         |
| Acute Care                   | 26 (52) |
| Rehabilitation               | 24 (48) |
| EMPLOYMENT STATUS N, %       |         |
| Full-time                    | 39 (78) |
| Part-time                    | 11 (22) |
| EDUCATIONAL BACKGROUND N, %  |         |
| College                      | 9 (18)  |
| University                   | 24 (48) |
| Graduate school              | 17 (34) |

## COREQ (COnsolidated criteria for REporting Qualitative research) Checklist

A checklist of items that should be included in reports of qualitative research. You must report the page number in your manuscript where you consider each of the items listed in this checklist. If you have not included this information, either revise your manuscript accordingly before submitting or note N/A.

| Topic                                          | Item No. | Guide Questions/Description                                                                                                                              | Reported on Page No. |
|------------------------------------------------|----------|----------------------------------------------------------------------------------------------------------------------------------------------------------|----------------------|
| <b>Domain 1: Research team and reflexivity</b> |          |                                                                                                                                                          |                      |
| <i>Personal characteristics</i>                |          |                                                                                                                                                          |                      |
| Interviewer/facilitator                        | 1        | Which author/s conducted the interview or focus group?                                                                                                   |                      |
| Credentials                                    | 2        | What were the researcher's credentials? E.g. PhD, MD                                                                                                     |                      |
| Occupation                                     | 3        | What was their occupation at the time of the study?                                                                                                      |                      |
| Gender                                         | 4        | Was the researcher male or female?                                                                                                                       |                      |
| Experience and training                        | 5        | What experience or training did the researcher have?                                                                                                     |                      |
| <i>Relationship with participants</i>          |          |                                                                                                                                                          |                      |
| Relationship established                       | 6        | Was a relationship established prior to study commencement?                                                                                              |                      |
| Participant knowledge of the interviewer       | 7        | What did the participants know about the researcher? e.g. personal goals, reasons for doing the research                                                 |                      |
| Interviewer characteristics                    | 8        | What characteristics were reported about the interviewer/facilitator? e.g. Bias, assumptions, reasons and interests in the research topic                |                      |
| <b>Domain 2: Study design</b>                  |          |                                                                                                                                                          |                      |
| <i>Theoretical framework</i>                   |          |                                                                                                                                                          |                      |
| Methodological orientation and Theory          | 9        | What methodological orientation was stated to underpin the study? e.g. grounded theory, discourse analysis, ethnography, phenomenology, content analysis |                      |
| <i>Participant selection</i>                   |          |                                                                                                                                                          |                      |
| Sampling                                       | 10       | How were participants selected? e.g. purposive, convenience, consecutive, snowball                                                                       |                      |
| Method of approach                             | 11       | How were participants approached? e.g. face-to-face, telephone, mail, email                                                                              |                      |
| Sample size                                    | 12       | How many participants were in the study?                                                                                                                 |                      |
| Non-participation                              | 13       | How many people refused to participate or dropped out? Reasons?                                                                                          |                      |
| <i>Setting</i>                                 |          |                                                                                                                                                          |                      |
| Setting of data collection                     | 14       | Where was the data collected? e.g. home, clinic, workplace                                                                                               |                      |
| Presence of non-participants                   | 15       | Was anyone else present besides the participants and researchers?                                                                                        |                      |
| Description of sample                          | 16       | What are the important characteristics of the sample? e.g. demographic data, date                                                                        |                      |
| <i>Data collection</i>                         |          |                                                                                                                                                          |                      |
| Interview guide                                | 17       | Were questions, prompts, guides provided by the authors? Was it pilot tested?                                                                            |                      |
| Repeat interviews                              | 18       | Were repeat interviews carried out? If yes, how many?                                                                                                    |                      |
| Audio/visual recording                         | 19       | Did the research use audio or visual recording to collect the data?                                                                                      |                      |
| Field notes                                    | 20       | Were field notes made during and/or after the interview or focus group?                                                                                  |                      |
| Duration                                       | 21       | What was the duration of the interviews or focus group?                                                                                                  |                      |
| Data saturation                                | 22       | Was data saturation discussed?                                                                                                                           |                      |
| Transcripts returned                           | 23       | Were transcripts returned to participants for comment and/or                                                                                             |                      |

| Topic                                  | Item No. | Guide Questions/Description                                                                                                        | Reported on Page No. |
|----------------------------------------|----------|------------------------------------------------------------------------------------------------------------------------------------|----------------------|
|                                        |          | correction?                                                                                                                        |                      |
| <b>Domain 3: analysis and findings</b> |          |                                                                                                                                    |                      |
| <i>Data analysis</i>                   |          |                                                                                                                                    |                      |
| Number of data coders                  | 24       | How many data coders coded the data?                                                                                               |                      |
| Description of the coding tree         | 25       | Did authors provide a description of the coding tree?                                                                              |                      |
| Derivation of themes                   | 26       | Were themes identified in advance or derived from the data?                                                                        |                      |
| Software                               | 27       | What software, if applicable, was used to manage the data?                                                                         |                      |
| Participant checking                   | 28       | Did participants provide feedback on the findings?                                                                                 |                      |
| <i>Reporting</i>                       |          |                                                                                                                                    |                      |
| Quotations presented                   | 29       | Were participant quotations presented to illustrate the themes/findings?<br>Was each quotation identified? e.g. participant number |                      |
| Data and findings consistent           | 30       | Was there consistency between the data presented and the findings?                                                                 |                      |
| Clarity of major themes                | 31       | Were major themes clearly presented in the findings?                                                                               |                      |
| Clarity of minor themes                | 32       | Is there a description of diverse cases or discussion of minor themes?                                                             |                      |

Developed from: Tong A, Sainsbury P, Craig J. Consolidated criteria for reporting qualitative research (COREQ): a 32-item checklist for interviews and focus groups. *International Journal for Quality in Health Care*. 2007. Volume 19, Number 6: pp. 349 – 357

**Once you have completed this checklist, please save a copy and upload it as part of your submission. DO NOT include this checklist as part of the main manuscript document. It must be uploaded as a separate file.**

# BMJ Open

## Elucidating the Information Exchange during Inter-facility Care Transitions: Insights from a Qualitative Study

|                                 |                                                                                                                                                                                                                                                                                                                                                                                                                                                      |
|---------------------------------|------------------------------------------------------------------------------------------------------------------------------------------------------------------------------------------------------------------------------------------------------------------------------------------------------------------------------------------------------------------------------------------------------------------------------------------------------|
| Journal:                        | <i>BMJ Open</i>                                                                                                                                                                                                                                                                                                                                                                                                                                      |
| Manuscript ID                   | bmjopen-2016-015400.R1                                                                                                                                                                                                                                                                                                                                                                                                                               |
| Article Type:                   | Research                                                                                                                                                                                                                                                                                                                                                                                                                                             |
| Date Submitted by the Author:   | 11-May-2017                                                                                                                                                                                                                                                                                                                                                                                                                                          |
| Complete List of Authors:       | Jeffs, Lianne; St Michael's, Saragosa, Marianne; St Michael's, Nursing Research Law, Madelyn; Brock University, Community Health Sciences Kuluski, Kerry; University of Toronto, Institute of Health Policy, Management & Evaluation; Lunenfeld-Tanenbaum Research Institute, Bridgepoint Collaboratory for Research and Innovation Espin, Sherry; Faculty of Community Services, Ryerson University Merkley, Jane; Mount Sinai Hospital Bell, Chaim |
| <b>Primary Subject Heading</b>: | Qualitative research                                                                                                                                                                                                                                                                                                                                                                                                                                 |
| Secondary Subject Heading:      | Health policy, Health services research, Nursing, Qualitative research                                                                                                                                                                                                                                                                                                                                                                               |
| Keywords:                       | QUALITATIVE RESEARCH, Quality in health care < HEALTH SERVICES ADMINISTRATION & MANAGEMENT, GERIATRIC MEDICINE                                                                                                                                                                                                                                                                                                                                       |
|                                 |                                                                                                                                                                                                                                                                                                                                                                                                                                                      |

SCHOLARONE™  
Manuscripts

Only

**Title:** Elucidating the Information Exchange during Intra-facility Care Transitions:  
Insights from a Qualitative Study

**Corresponding author:**

Lianne Jeffs, RN, PhD, FAAN  
St. Michael's Hospital Volunteer Association Chair in Nursing Research  
Li Ka Shing Knowledge Institute  
209 Victoria St – Room 720  
Toronto ON M5B 1T8  
Email: jeffsl@smh.ca  
Tele: 416-864-6060, ext 77644

**Co-Authors:**

1. Marianne Saragosa  
St. Michael's Hospital  
Toronto Canada
2. Madelyn Law  
Department of Health Science, Brock University  
St. Catherine's Canada
3. Kerry Kuluski  
Lunenburg-Tanenbaum Research Institute, Sinai Health System  
Toronto Canada
4. Sherry Espin  
Daphne Cockwell School of Nursing, Ryerson University  
Toronto Canada
5. Jane Merkley  
Sinai Health System  
Toronto Canada
6. Chaim Bell  
Sinai Health System  
Toronto Canada

**Keywords:** continuity of care, older patients, care transitions, qualitative research, information

**Word count:** 4785

## Abstract

**Objective** To explore the perceptions of patients, their caregivers, and health care professionals associated with the exchange of information during transitioning from two acute care hospitals to one rehabilitation hospital.

**Design** An exploratory qualitative study using semi-structured interviews and observation.

**Participants and setting** Patients over the age of 65 admitted to an orthopedic unit for a non-elective admission, their caregivers, and health care professionals involved in their care. Participating sites included orthopedic inpatient units from two acute care teaching hospitals and one orthopedic unit at a rehabilitation hospital in an urban setting.

**Findings** Three distinct themes emerged from participants' narrative of their transitional care experience: 1) having no clue what the care plan is; 2) being told and notified about the plan; and 3) experiencing challenges absorbing information. Participating patients and their caregivers reported not being engaged in an active discussion with health care professionals about their care transition plan. Several health care professionals described withholding information within the plan until they themselves were clear about the transition outcomes.

**Conclusion** This study highlights the need to increase efforts to ensure effective information exchanges occur during transition from acute care hospital to rehabilitation settings.

## Article Summary

### Strengths and limitations of this study

- This study explores the understudied area of the perceptions of patients, their caregivers, and health care professionals associated with the exchange of information during transitioning from two acute care hospitals to one rehabilitation hospital
- The study was only conducted with non-elective orthopedic patients and their caregiver at two acute care teaching hospitals and one rehabilitation hospital in an urban setting in Canada. Thus, our findings may not be transferrable to other geographical locations or other patient populations (e.g. medically complex patients without orthopedic injury)
- There is a potential for social desirability bias when conducting interviews with participants

**Elucidating the Information Exchange during Inter-facility Care Transitions:**

## Insights from a Qualitative Study

### INTRODUCTION

It is well established that care transitions points present potential for threats to safety and quality.[1] These threats can result in harm to patients,[2] an increased risk of readmission,[3] increased length of stay,[4] and economic burden to the health care system and patients and their families.[5] Deficits in communication and the inadequate exchange of information around discharge home from hospital [1, 6] or transfer to another health care facility [2, 7, 8] underpin such threats. Poor information exchange often includes inaccurate or missing information regarding patients current health status, medication plan, functional and psychological history and unresolved plans for follow-up care post discharge or transfer from a hospital to another facility.[4, 7] Patients and their caregivers (e.g., family) may then be uninformed or misinformed about their illness and medications and not be able to carry out the care transitions plan or manage their own health.[9]

The exchange and transfer of accurate and complete information to patients and their caregivers around what is currently happening and what to expect next is an important component of ensuring quality care transitions.[8, 10, 11] By providing information to patients (and when available their caregivers) they are more informed and have the potential to actively participate in their care [8] which is associated with improved patient satisfaction and clinical outcomes.[12] However, varying degrees of information exchange with patients [13] and their subsequent participation in their care planning [11, 14] have been reported. The information exchange between acute care hospitals to rehabilitation settings has received less attention in the literature as compared



1  
2  
3 to those discharged home from the hospital.[7,8,15] Minimal evidence in the literature  
4 exists around the nature of the information exchange [15] including the patients' (and  
5 when available caregivers') desire for information.[8] Insight is needed around the nature  
6 of information exchange with patients as they transition from acute care hospitals to  
7 rehabilitation settings, as these patients are potentially more vulnerable and their medical  
8 conditions more active than for patients discharged home.[15] Further this exchange of  
9 information often forms the basis for admission orders in the rehabilitation setting  
10 influencing subsequent transitions in care.[15] In this context, a study was undertaken to  
11 explore the perceptions of patients, their caregivers, and health care professionals  
12 associated with the exchange of information during transitioning from two acute care  
13 hospitals to one rehabilitation hospital.  
14  
15  
16  
17  
18  
19  
20  
21  
22  
23  
24  
25  
26  
27  
28

## 29 **METHODS**

30  
31 This study employed an exploratory qualitative design to gain insight into the  
32 perceptions and experiences associated with care transitions of non-elective patients 65  
33 years and older, caregivers, and health care professionals being transferred out of the  
34 acute care hospital to a rehabilitation facility. Non-elective patients did not expect to be  
35 admitted to hospital and therefore had no pre hospital planning for transfer to another  
36 setting. Funding was received by the Ontario Ministry of Health and Long Term Care  
37 (Grant Number: 06693).  
38  
39  
40  
41  
42  
43  
44  
45  
46  
47

### 48 **Setting**

49  
50 Participating sites included orthopedic inpatient units from two acute care  
51 teaching hospitals and one orthopedic unit at a rehabilitation hospital in an urban setting.  
52  
53 Our study targeted patients 65 years and older who had undergone a non-elective  
54  
55  
56  
57  
58  
59  
60

1  
2  
3 admission (e.g. a patient who had fallen or had an accident that had sustained a fracture)  
4  
5 their family member (referred to here within as caregiver), and health care professionals  
6  
7 (physicians, nurses, nurse practitioners, physiotherapists, occupational therapists,  
8  
9 pharmacists and social workers).  
10  
11

### 12 **Recruitment and Data Collection Process**

14  
15 A purposeful sampling strategy was employed whereby study participants who  
16  
17 met the eligibility criteria (see Box 1) were identified and approached face-to-face by a  
18  
19 research coordinator (MS).[16] The research coordinator was a Master's prepared nurse  
20  
21 with extensive experience in qualitative research. Eligible patients, who were unknown to  
22  
23 the research coordinator prior to study commencement, were provided an overview of the  
24  
25 study and the research coordinator then obtained consent from those patients willing to  
26  
27 participate. Once the patient was enrolled, the research coordinator approached caregivers  
28  
29 at the participating sites for involvement in the study. Caregivers were provided an  
30  
31 overview of the study and then the research coordinator obtained their consent. Patient  
32  
33 and caregiver interviews took place at the rehabilitation facility following the transfer  
34  
35 from the acute care hospital. Most interviews were conducted were face-to-face;  
36  
37 however, for three caregivers a total of four interviews (one caregiver was interviewed  
38  
39 twice) took place over the phone for convenience.  
40  
41  
42  
43  
44  
45  
46  
47  
48  
49  
50  
51  
52

53  
54 Health care professionals were informed of the study by their respective unit  
55  
56 managers. Members of the interprofessional team were selected based on their direct  
57  
58  
59  
60

1  
2  
3 involvement in the care transition of the study patient at either the acute care or  
4  
5  
6 rehabilitation site. Those involved were approached face-to-face by the research  
7  
8  
9 coordinator who then provided an overview of the study and obtained informed consent  
10  
11  
12 prior to conducting the interview. Health care professionals consisted of nurses, social  
13  
14  
15 workers, occupational therapists, physical therapists, pharmacists, physicians, and unit  
16  
17  
18 managers. Health care professionals were interviewed face-to-face either at the acute care  
19  
20  
21 site and the rehabilitation site following the transition of the patient.  
22  
23  
24

25 Box 1

26  
27 Patient: 65 and older; able to comprehend English and provide consent; and non-elective  
28 orthopedic patient being transferred to specific rehabilitation facility  
29

30  
31 Caregiver: caregiver of non-elective patient being transferred to specific rehabilitation  
32 facility who is 65 and older and able to comprehend English and provide consent  
33

34  
35 Health care professional: health care professionals at the acute care hospital or  
36 rehabilitation facility and able to comprehend English and provide consent and  
37 provided care the patients who were recruited for the study.  
38

39  
40 Semi-structured interview guides were used with study participants to elicit their  
41  
42 perceptions and experiences associated with the care transitions of non-elective medically  
43  
44 complex patients 65 and older. The interview guides were developed from a realist  
45  
46 review and Delphi panel detailed in a separate paper [17] and are included as  
47  
48 Supplementary Files. Pilot testing of the interview guide occurred with the first few  
49  
50 participants with additional prompts made to the interview guides. Patients and caregivers  
51  
52 were interviewed after they transitioned from the rehabilitation hospital from the acute  
53  
54 care and where possible prior to being discharged home from the rehabilitation  
55  
56  
57  
58  
59  
60

1  
2  
3 organization. This occurred in six incidences where patients or their caregiver were  
4 interviewed either shortly before or after discharge home. Health care professions  
5 participated in one interview. All interviews were audio recorded and transcribed  
6 verbatim by a professional transcriptionist. Field notes were taken by the research  
7 coordinator following the interview and shared with the research team. Duration of  
8 interviews averaged between 6 and 60 minutes. The shortest interview at 6 minutes was  
9 the result of the participant being called away to attend to patient care. Participants  
10 completed a short demographic questionnaire prior to the start of the interview. Data  
11 saturation occurred once data findings were noticeably redundant despite new  
12 participants.  
13  
14  
15  
16  
17  
18  
19  
20  
21  
22  
23  
24  
25

## 26 **Data analysis**

27  
28  
29 Directed content analysis was used to analyze the transcribed interviews.[18]  
30 Each transcript was individually reviewed and coded by the principal investigator (PI)  
31 and two research staff. Simultaneous and iterative coding occurred with the patient,  
32 caregiver and health care professionals. The initial coding schema, derived from the data,  
33 was developed once consensus was met between the coders. The codes were combined  
34 into categories that were further refined into themes by the PI and two research staff. As a  
35 final step to ensure methodological rigor, the PI reviewed all of the original transcripts  
36 with the emergent coding schema to ensure all codes and categories had been captured  
37 from the transcripts in the final coding schema.[16]  
38  
39  
40  
41  
42  
43  
44  
45  
46  
47  
48  
49

## 50 **RESULTS**

### 51 **Participant characteristics**

52  
53  
54  
55  
56  
57  
58  
59  
60

In total, 15 patients from an orthopedic unit who met the eligibility criteria were identified and 13 patients consented to participate. Two were screened and found to be ineligible with one patient subsequently transferred to a non-rehabilitation unit and the other presented with a cognitive deficit. Cognitive deficit was determined based on recent cognitive testing as reported in the patient's chart. Patient participants were mostly female (n = 9) with 4 males. The patients had an average age of 82.9 years with a range from 68 to 91. Of the 13 patients who were enrolled in the study, nine caregivers were recruited and enrolled in the study. Caregiver participants reported an average age of 63.1 years, which ranged from 51 to 89 years. In total, 50 health care professionals participated in an interview with 29 nurses, 6 pharmacists, 8 physical therapists, 3 social workers, 2 occupational therapists, 1 patient care manager, and 1 physician. There were 39 female and 11 male study participants in this cohort. One HCP approached for the study refused to participate because of concerns related to anonymity. Table 1 provides more details on the study participant characteristics.

Table 1 Study Participant Characteristics

| Characteristic             | Description                                                                                                                                        |
|----------------------------|----------------------------------------------------------------------------------------------------------------------------------------------------|
| Patients                   |                                                                                                                                                    |
| Morbidities                | Patients had on average 5.4 morbidities (e.g. Parkinson's disease, chronic obstructive pulmonary disease, hypertension), which ranged from 2 to 16 |
| Living arrangements        | All patients lived alone with the exception of one patient who lived with a spouse                                                                 |
| Medications                | The patients were prescribed on average 8.5 medications with a range of 5 to 17 medications                                                        |
| Caregivers                 |                                                                                                                                                    |
| Sex                        | All caregivers were female                                                                                                                         |
| Relationship to patient    | Seven were adult children, one was a spouse and one was a sibling                                                                                  |
| Duration of caregiver role | 6.25 on average with a range of 1 to 20 years                                                                                                      |
| Health care professionals  |                                                                                                                                                    |

|                     |                    |      |
|---------------------|--------------------|------|
| Years of experience | less than 1 year   | n=3  |
|                     | 2 - 5 years        | n=14 |
|                     | 6 - 10 years       | n= 6 |
|                     | 11 - 15 years      | n=12 |
|                     | more than 16 years | n=15 |
| Job status          | Full-time (n=39)   |      |
|                     | Part-time (n=11)   |      |
| Level of education  | Baccalaureate      | n=24 |
|                     | Graduate           | n=17 |
|                     | College            | n=9  |

## FINDINGS

The following three themes emerged from the interviews: having no clue what the care plan is; being told and notified about the plan; and experiencing challenges absorbing information.

### *Having “no clue” what the care plan is*

This theme reflects how several patients and their caregivers were unaware of the details of their transition plan from the acute care to rehabilitation hospital setting.

Several participants described having “no clue” about their care plan. Caregiver and patient experiences ranged from receiving “*tidbits of information*” to “*no information*” and “*leaving without a plan*” when the patient was being transferred. As a result, some caregivers described not knowing what to expect at the rehabilitation hospital. For example, one caregiver described being “*plunked*” in the hospital with a package of papers in an envelope that contained information on follow-up appointments that were not explained to them. Health care professionals acknowledged that they often did not know if the transition plan had been communicated to patients and their caregivers. This theme is illustrated in the following quotes:

*I just assume that somewhere along the way I was going to get out. Then it was one day, you’re going tomorrow and I thought, really? Already? And off we*

1  
2  
3  
4  
5  
6  
7  
8  
9  
10  
11  
12  
13  
14  
15  
16  
17  
18  
19  
20  
21  
22  
23  
24  
25  
26  
27  
28  
29  
30  
31  
32  
33  
34  
35  
36  
37  
38  
39  
40  
41  
42  
43  
44  
45  
46  
47  
48  
49  
50  
51  
52  
53  
54  
55  
56  
57  
58  
59  
60

*went. I don't recall anyone saying, when you get there, you can expect this to be different or that to be the same or ... it was just, okay, now is the time and off you go. (patient hospital site 2)*

*I was given a package with her follow-up appointments in it but it wasn't explained to me. So I have no clue - How does she get there? Is anything happening over the weekend? Is it starting on Monday? What's going to happen? No information. We've just been plunked here with no information. (caregiver hospital site 1)*

*It was to my surprise yesterday, that I received a call from one of her visitors telling me that your mom is going to Hospital-X tomorrow and that she needs clothes. I think that I should have received a more formal call from somebody with the plan. There are questions, little tidbits of information I have received, i.e. mom's current drugs that she's taken. So apparently that's being changed...I don't know the outcome of anything so I don't know the plan except that she's here now at Hospital-X. (caregiver hospital site 2)*

*They have a discharge list, a little envelope that the patients get. I'm not sure that they go through all of that with the patient. I think it probably varies. I don't know. I'm going to guess that some nurses are really good and go over it in detail, and I think others just say, here's your envelope, goodbye. (physician rehabilitation hospital)*

Caregivers also described that they would have to wait to connect with health care professionals to engage in a conversation around the care transitions plan and goals for their family member who was a patient. In some cases, caregivers questioned whether there was a plan in place that had not been communicated to them or their family member. Health care professionals described withholding details of the plan until they themselves knew where the patient was going to and what would be happening next. For some participants when they did speak to health care professionals they described receiving information around the immediate status of their family member but minimal to no information about the follow-up plan. One caregiver described that the health care professionals were “*dealing with the stage you are at*” and one health care professional

1  
2  
3 described “*being focused on doing the rehab part*”. The following narrative examples  
4  
5  
6 elucidate this theme.

7  
8 *No one has spoken to me or to my mother about the goal. No one’s talked about a*  
9 *deadline or time period, which they tell you in the booklet they will. So I keep*  
10 *waiting for someone to call me so we can sit down and talk about this. I still have*  
11 *no idea how long my mother will be here. It seems that they deal with the stage*  
12 *you’re at. Hospital-X was an acute care, just to deal with the pain management,*  
13 *to start physiotherapy and this is the next stage in the physiotherapy, more intense*  
14 *physiotherapy. In terms of follow up or whether there will be follow up, nothing.*  
15 *In terms of being put in communication as to where my mother is going, there’s*  
16 *been no connection whatsoever. (caregiver hospital site 1)*  
17  
18

19  
20 *I think families and patients have expectations that they want to go to a certain*  
21 *rehab facility, but that doesn’t always happen. I don’t know if that is always*  
22 *carried out clearly to the patient and their respective family members. I would say*  
23 *I don’t tell them consistently ... I would tell them if they asked me and it doesn’t*  
24 *come up naturally. (occupational therapist hospital site 1)*  
25  
26

### 27 ***Being told and notified about the plan***

28  
29 This theme captures how some patients and their caregivers were informed about  
30  
31 their plan for care transitions. Experiences of being informed of the care transitions plan  
32  
33 mainly were one-direction in nature in that health care professionals told and explained  
34  
35 the plan to patients and/or their caregivers, but did not engage in an interactive dialogue.  
36  
37 For some participants, health care professionals explained what was going on and where  
38  
39 the patients were going with the patients and their caregivers. This often included telling  
40  
41 the patients and caregivers information about follow-up appointments, expectations about  
42  
43 their recovery and therapy to where they were being transferred to and discharged home,  
44  
45 and in some cases equipment that will be required once discharged home. Patients and  
46  
47 caregivers did not report being engaged in an active discussion with health care  
48  
49 professionals about their care transitions plan. For example, one caregiver and patient  
50  
51 described being “*well informed all the time*” but not being involved in a discussion with  
52  
53  
54  
55  
56  
57  
58  
59  
60



1  
2  
3 the health care professionals about their care transitions plan. Often patients and  
4  
5 caregivers were comfortable with the passive nature of information exchange as they felt  
6  
7 that the health care team knew what they were doing and would connect with patients and  
8  
9 their caregivers at their discretion when required. This theme is further illustrated in the  
10  
11 following quotes:  
12  
13

14  
15 *Hospital-X did a really, really good job of keeping all of us informed and relaying*  
16 *whatever information they had, they would give it. I certainly knew all that was*  
17 *going on. I was well aware of the process. (patient hospital site 1)*  
18

19  
20 *It was more just us expressing our recommendations, and the patient agreeing,*  
21 *and then we moved forward with the plan just by submitting it. So I think,*  
22 *probably the patient's role is also minimal once we've determined, yes, rehab is*  
23 *the plan. So other than consenting and choosing his preferences, I think their*  
24 *involvement in transitioning from here to rehab is also probably minimal.*  
25 *(physiotherapist hospital site 1)*  
26

27  
28 *Most of the time, the patient comes here, they're expecting to have their lives*  
29 *back, to do whatever they do before this fracture, these things happened. Now that*  
30 *you ask it, some of the patients don't know what the expectation is from after*  
31 *surgery and going to a different facility. Because they think that's like when you*  
32 *have hip surgery or something like that, they only stay for 24 hours and then go to*  
33 *another facility. But those patients that are first time, seriously they don't know.*  
34 *So that's why when they come here, we have to explain. (nurse rehabilitation*  
35 *hospital).*  
36

37  
38 *It was all in the folder that she got, and I was reading through it before we even*  
39 *left the hospital. I knew what to expect when we left the hospital. I knew*  
40 *everything ahead of time so I was up on all of it because the appointments and*  
41 *everything that were scheduled for her were all in the envelope. Everything was*  
42 *there, and it was all well put together. (caregiver hospital site 1, discharge*  
43 *interview)*  
44  
45

### 46 47 ***Experiencing challenges absorbing the information***

48  
49 This third theme elucidates that some patients experienced challenges when  
50  
51 attempting to absorb the information that was provided to them about their care  
52  
53 transitions plan. Challenges in absorbing the information were often associated with the  
54  
55 patients being “quite medicated” and “drugged up” or experiencing symptoms (e.g. pain  
56  
57  
58  
59  
60

1  
2  
3 and constipation) that compromised their ability to understand the information. The fast  
4  
5 pace of recovering from a non-elective injury and “getting bombarded” with a number of  
6  
7 health care professionals was also reported by patients and their caregivers. In turn, this  
8  
9 pace and number of interactions with health care professionals was perceived as  
10  
11 contributing to patients not being able to remember and absorb information about what  
12  
13 was happening and their care transitions plan. A The following excerpts are examples of  
14  
15 this theme:  
16  
17  
18  
19

20 *I have to say that, while I was at Hospital-X, I was quite heavily medicated*  
21 *because of just having had the hip replacement done. I wouldn't have had a clue*  
22 *what was happening about half the time, not because people weren't telling me*  
23 *but just because I wouldn't have been able to keep up with them. (patient hospital*  
24 *site 2) ... As mom says, things were coming like a train down a track. Everything*  
25 *was moving at high speed. There is important information that is coming to you*  
26 *all of the time and it's coming at you fast and furious. (caregiver hospital site 2)*  
27  
28

29 *I think when our nurse practitioner and case manager speaks to family or a*  
30 *patient about the next step in their plan. I'm sure they are being conveyed, but*  
31 *sometimes, when everything is happening so quickly, a patient might have*  
32 *forgotten what is going on or the family might be a little bit confused.*  
33 *(occupational therapist hospital site 1)*  
34  
35

36 *It's a little bit hard in the first day because they either travelled, they're tired,*  
37 *they're in pain, so they're not quite there and they get bombarded with everyone*  
38 *talking to them on the first day. (pharmacist rehabilitation hospital)*  
39  
40

41 *But Mom, I don't think was in any position to absorb the amount of information*  
42 *and the decision making. They can't just flit in and out of her bedroom with tons*  
43 *of information and expect her to retain it. (caregiver hospital site 2)*  
44  
45

## 46 **DISCUSSION**

47

48 Our findings elucidate the nature of the exchange of information amongst patients  
49  
50 and their caregivers with health care professionals during transitions from acute care  
51  
52 hospital to rehabilitation settings. The three emergent themes findings add to the growing  
53  
54  
55  
56  
57  
58  
59  
60

1  
2  
3 body of literature regarding information exchange during care transitions from acute care  
4  
5 hospital to rehabilitation settings.  
6  
7

8 The experience of not knowing the plan and confusion about next steps (having  
9  
10 “no clue”) identified in our study was consistent with what has been reported in other  
11  
12 studies.[7, 8, 12, 19-21] Our finding of patients and their caregivers having tidbits of or  
13  
14 no information is in line with other studies. For example, one study reported that as  
15  
16 patients transferred from the hospital to a rehabilitation setting they received very little  
17  
18 information about what happened to them and when they did it was typically unstructured  
19  
20 or insufficiently explained.[8] Likewise, another study reported that patients and  
21  
22 caregivers did not receive the required information about the reasons for their transfers to  
23  
24 hospitals, medical diagnoses and planned treatments, resulting in lack of awareness of  
25  
26 both their change in health status and transition plan.[19] In our study, the lack of  
27  
28 information resulted in confusion for patients and caregivers with little guidance on how  
29  
30 to navigate post transfer from the hospital. In another study, more than one third of  
31  
32 patients could not clearly describe their diagnosis and less than half could recall follow  
33  
34 up appointments that had been made for them.[21]  
35  
36  
37  
38  
39  
40

41 Our study finding around patients and caregivers waiting to connect with health  
42  
43 care professionals to find out information on the care transition plan has been reported  
44  
45 elsewhere.[19] Similar to our study, others have reported not talking to anyone about  
46  
47 their post-discharge care.[12] In our study, when an information exchange did occur  
48  
49 between patients and their caregivers with health care professionals, the exchange was  
50  
51 often uni-directional (e.g. patients and caregivers were told, informed, notified). Further,  
52  
53 the exchange focused on the immediate status of the patient compared to the overall plan  
54  
55  
56  
57  
58  
59  
60

1  
2  
3 for transitions from the hospital to the rehabilitation hospital to eventually being  
4 discharged home or to a long-term care facility. Interesting, other studies have described  
5 patients and caregivers as satisfied with the nature of a uni-directional information  
6 exchange [11] and not viewing it necessary to obtain more information than what was  
7 provided.[8]  
8  
9

10  
11  
12  
13  
14  
15  
16  
17  
18 Our study finding around the challenges that patients experienced in absorbing  
19 information about their plan for transitions to the rehabilitation setting has also been  
20 highlighted in research focused on discharge home from hospital.[9] Similar to Coleman  
21 et al's findings,[2] the volume of information and number of interactions with health care  
22 professions conveyed in a short period of time presented significant challenges to patients  
23 being able to absorb and retain the information around their care transitions plan.  
24  
25  
26  
27  
28  
29  
30  
31

32  
33  
34 Collectively, our study findings elucidate the need for a multi-component  
35 approach to ensure effective information exchanges are occurring with patients and their  
36 caregivers as they transition from acute care hospital to rehabilitation settings. Providing  
37 information to patients and their caregivers in a timely fashion and with consistent health  
38 care professionals is essential to ensure that they understand the information provided to  
39 them. Patients and caregivers should be kept thoroughly informed throughout the various  
40 care transitions points.[20] Health care professionals need to ascertain what information  
41 the patient and caregiver want to know and when and how and when to best to convey  
42 this relevant information to ensure adequate understanding of and carrying out of their  
43 care transitions plan.[7] Furthermore, health care professionals need to determine whether  
44  
45  
46  
47  
48  
49  
50  
51  
52  
53  
54  
55  
56  
57  
58  
59  
60

1  
2  
3 patients and caregivers prefer to be passively or actively involved in their care transitions  
4  
5  
6 planning.[14]  
7

8           Recently in Ontario, the implementation of a Patient-Oriented Discharge  
9  
10 Summary (PODS) tool with a variety of patient populations being discharged from  
11  
12 hospital to home has shown that the majority of patients who receive PODS have an  
13  
14 improved understanding of their discharge instructions.[22,23] This tool could be adapted  
15  
16 for inter-facility care transitions and study findings could assist in tailoring the tool to the  
17  
18 local context and ensure accurate, timely and relevant information is exchanged during  
19  
20 inter-facility transitions of care. For example the inter-facility care transitions tool could  
21  
22 have information on the care transition plan on where the patient is being transferred to;  
23  
24 follow-up appointments; who to contact should worsening symptoms occur; medications;  
25  
26 and any other information deemed relevant and meaningful for the patient and caregiver  
27  
28 to have included.  
29  
30  
31  
32  
33

34           This tool should be completed as part of a face-to-face conversation that health  
35  
36 care professionals engage in with patients (and their caregivers when present) around the  
37  
38 care transition plan. Further, promising signs are being observed with teach back methods  
39  
40 whereby patients are provided information about the care transitions plan including  
41  
42 where the patient is going to by health care professionals and are then asked to share what  
43  
44 information has been provided to them.[1, 21] This strategy allows for the health care  
45  
46 professional to verify the patients' (and when present the caregiver(s)) understanding of  
47  
48 the care transitions plan and correct any misinterpretations.[19] This type of information  
49  
50 exchange is particularly important for patient populations (like the older non-elective  
51  
52  
53  
54  
55  
56  
57  
58  
59  
60

1  
2  
3 orthopedic patient included in this current study) who experience challenges absorbing  
4 information.  
5  
6

7  
8 Finally, the Registered Nurses Association of Ontario's Care Transitions Best  
9 Practice Guideline (BPG) provides a series of evidence and expert informed  
10 recommendations to ensure effective information exchange between patients, their  
11 caregivers and health care professionals occurs during care transitions.[24,25] Further, a  
12 recent realist review and structured expert panel identified a series of interventions aimed  
13 at enhancing care transitions at the system, organizational, health care professions/teams  
14 and patient/caregiver levels.[17] Together, these data sources can be used as blueprints by  
15 leaders in their efforts of creating and enacting policies and a cultivating a culture of  
16 caring aimed at improving the information exchange as a mechanism to enhance the  
17 quality of the relationship between patients and caregivers and health care professionals  
18 during care transitions.  
19  
20  
21  
22  
23  
24  
25  
26  
27  
28  
29  
30  
31  
32  
33

34 Our study findings need to be viewed with the following potential limitations.,  
35 First our findings may not be transferrable to other geographical locations or other patient  
36 populations (e.g. medically complex patients without orthopedic injury). Second, there is  
37 a potential for social desirability bias when conducting interviews with participants. To  
38 mitigate this bias, the interview guide was carefully constructed to elicit patients', their  
39 caregivers', and professionals' perceptions and experiences associated with the care  
40 transitions from acute care hospital to a rehabilitation hospital.  
41  
42  
43  
44  
45  
46  
47  
48  
49

## 50 CONCLUSION

51  
52  
53 Our study provides insight around the nature of information exchange with  
54 patients as they transition from acute care hospital to rehabilitation settings. Specifically,  
55  
56  
57  
58  
59  
60

1  
2  
3 our study revealed that many patients and caregivers have little to no information about  
4 their plan and are waiting to get this information so they know what to expect. When  
5 patients and caregivers received information it was a passive exchange where they were  
6 told or notified of what was going on and what was next representing a more paternalistic  
7 as opposed to collaborative exchange. For some patients they had challenges absorbing  
8 the information provided due to being medicated, experiencing other symptoms, or being  
9 approached by too many health care professionals. Future efforts are required to ensure  
10 effective information exchanges are occurring with patients and their caregivers as they  
11 transition from acute care to rehabilitation to ensure that information is not only shared  
12 but discussed with patients and caregivers. Bi-directional exchange between  
13 professionals, patients and where possible, caregivers will provide opportunities for all  
14 parties to provide input into the plan, confirm understanding and expectations. Further,  
15 choosing an appropriate time to share the information, where possible, when the patient is  
16 most stable, will ensure a greater potential of information retention.  
17  
18  
19  
20  
21  
22  
23  
24  
25  
26  
27  
28  
29  
30  
31  
32  
33  
34  
35  
36  
37  
38  
39  
40  
41  
42  
43  
44  
45  
46  
47  
48  
49  
50  
51  
52  
53  
54  
55  
56  
57  
58  
59  
60

1  
2  
3 **Ethics approval:** Ethics approval was obtained from the Research Ethics Boards from  
4  
5 the Sinai Health System (one acute care hospital site and a rehabilitation site) and .St.  
6  
7 Michaels Hospital. Informed consent was obtained from all study participants prior to  
8  
9 conducting the interviews.  
10  
11

12  
13  
14 **Contributorship statement:** LJ conceived and designed the study. MS, ML, KK and SE  
15  
16 planned and completed the analysis. LJ wrote the manuscript with revisions being made  
17  
18 by MS, ML, KK and SE. All authors read and approved of the final manuscript.  
19  
20

21 **Competing interests:** None declared.  
22  
23

24 **Funding:** This project was funded by the Ontario Ministry of Health and Long Term  
25  
26 Care.  
27  
28

29 **Data sharing statement:** No additional data are available.  
30  
31  
32  
33  
34  
35  
36  
37  
38  
39  
40  
41  
42  
43  
44  
45  
46  
47  
48  
49  
50  
51  
52  
53  
54  
55  
56  
57  
58  
59  
60



## REFERENCES

1. Coleman EA, Chugh A, Williams MV, *et al.* Understanding and execution of discharge instructions. *Am J Med Qual* 2013;5:383-91
2. Coleman EA. Falling through the cracks: challenges and opportunities for improving transitional care for persons with continuous complex care needs. *J Am Geriatr Soc* 2003;51:549-55.
3. Olsen RM, Østnor BH, Enmarker I, *et al.* Barriers to information exchange during older patients' transfer: nurses' experiences. *J Clin Nurs* 2013;22:2964-73.
4. King BJ, Gilmore□Bykovskyi AL, Roiland RA, *et al.* The consequences of poor communication during transitions from hospital to skilled nursing facility: a qualitative study. *J Am Geriatr Soc* 2013;61:1095-102.
5. Burbach BE, Cohen MZ, Zimmerman LM, *et al.* Post-hospitalization transition to home: Patient perspectives of a personalized approach. *J Nurs Educ Pract* 2016;6:32-40.
6. Dossa A, Bokhour B, Hoenig H. Care transitions from the hospital to home for patients with mobility impairments: patient and family caregiver experiences. *Rehabil Nurs* 2012;37:277-85.
7. Jeffs L, Kitto S, Merkley J, *et al.* Safety threats and opportunities to improve interfacility care transitions: insights from patients and family members. *Patient Prefer Adherence* 2012;6:711-18
8. McKain S, Henderson A, Kuys S, *et al.* Exploration of patients' needs for information on arrival at a geriatric and rehabilitation unit. *J Clin Nurs* 2005;14:704-10.
9. Ford BK, Ingersoll-Dayton B, Burgio K. Care transitions experiences of older Veterans and their caregivers. *Health Soc Work* 2016;41:129-38.
10. Strahan EH, Brown RJ. A qualitative study of the experiences of patients following transfer from intensive care. *Intensive Crit Care Nurs* 2005;21:160-71.
11. Flink M, Öhlén G, Hansagi H, *et al.* Beliefs and experiences can influence patient participation in handover between primary and secondary care—a qualitative study of patient perspectives. *BMJ Qual Saf* 2012;21(Suppl 1):76-83.
12. Flacker J, Park W, Sims A. Hospital discharge information and older patients: do they get what they need?. *J Hosp Med* 2007;2:291-6.
13. Dyrstad DN, Laugaland KA, Storm M. An observational study of older patients' participation in hospital admission and discharge—exploring patient and next of kin perspectives. *J Clin Nurs* 2015;24:1693-706.
14. Swinkels A, Mitchell T. Delayed transfer from hospital to community settings: the older person's perspective. *Health Soc Care Community* 2009;17:45-53.
15. Gandara E, Moniz T, Ungar J, *et al.* Communication and information deficits in patients discharged to rehabilitation facilities: an evaluation of five acute care hospitals. *J Hosp Med* 2009;4:E28-E33.

16. Patton MQ. *Qualitative research and evaluation methods*. Thousand Oaks: California, 2002.
17. Jeffs L, Kuluski K, Law M, *et al*. Identifying effective nurse-led care transition interventions for older adults with complex needs using a structured expert panel. *Worldviews Evid Based Nurs*. 2016; In Press.
18. Hsieh HF, Shannon SE. Three approaches to qualitative content analysis. *Qual Health Res* 2005;15:1277-88.
19. Toles MP, Abbott KM, Hirschman KB, *et al*. Transitions in care among older adults receiving long-term services and supports. *J Gerontol Nurs* 2012;38:40-7.
20. Rustad EC, Furnes B, Cronfalk BS, Dysvik E. Older patients experiences during care transitions. *Pat Pref and Adher* 2016; 10:769-779.
21. Horwitz LI, Moriarty JP, Chen C, *et al*. Quality of discharge practices and patient understanding at an academic medical center. *JAMA Intern Med* 2013;173:1715-22.
22. Hahn-Goldberg S, Okrainec K, Huynh T, Abrams H, *et al*. Implementing patient oriented discharge summaries (PODS): A multi-site pilot across early adopter hospitals. Accepted to *Healthcare Quarterly*. 2015; In Press.
23. Hahn-Goldberg S, Okrainec K, Huynh T, *et al*. Co-creating patient-oriented discharge instructions with patients, caregivers, and healthcare providers. *J Hosp Med* 2015; 10:804-7.
24. Dusek B, Pearce N, Harripaul A, Lloyd M. Care transitions: A Systematic Review of Best Practices. *Journal of nursing care qual* 2015;30: 233-239.
25. Registered Nurses Association of Ontario. Care transitions Best Practice Guideline. [http://rnao.ca/sites/rnao-ca/files/Care\\_Transitions\\_BPG.pdf](http://rnao.ca/sites/rnao-ca/files/Care_Transitions_BPG.pdf) (accessed August 2016).

## Patient Characteristics

|                           |       |
|---------------------------|-------|
| Total                     | 13    |
| Sex                       |       |
| Female                    | 9     |
| Male                      | 4     |
| AGE                       |       |
| Average (Y)               | 82.9  |
| Range                     | 91-68 |
| CO-MORBIDITIES            |       |
| Average                   | 5.4   |
| Range                     | 2-16  |
| LIVING ARRANGEMENT        |       |
| Lives alone               | 12    |
| Lives with spouse/partner | 1     |
| MEDICATIONS               |       |
| Average                   | 8.5   |
| Range                     | 17-5  |

## Caregiver Characteristics

|                                     |       |
|-------------------------------------|-------|
| Total                               | 9     |
| SEX                                 |       |
| Female                              | 9     |
| AGE                                 |       |
| Average                             | 63.1  |
| Range                               | 51-89 |
| RELATIONSHIP TO PATIENT             |       |
| Child                               | 7     |
| Spouse                              | 1     |
| Sibling                             | 1     |
| DURATION OF CAREGIVER ROLE IN YEARS |       |
| Average                             | 6.25  |
| Range                               | 1-20  |

## Healthcare Professional Characteristics

|                              |         |
|------------------------------|---------|
| Total                        | 50      |
| Sex                          |         |
| F (%)                        | 39 (78) |
| M                            | 11 (22) |
| PROFESSIONAL BACKGROUND N, % |         |
| Nursing                      | 29 (58) |
| Pharmacy                     | 6 (12)  |
| Physical Therapy             | 8 (16)  |
| Social Work                  | 3 (6)   |
| Occupational therapy         | 2 (4)   |
| Medicine                     | 1 (2)   |
| Management                   | 1 (2)   |
| YEARS OF EXPERIENCE          |         |
| <1 Year (%)                  | 3 (6)   |
| 2-5 years (%)                | 14 (28) |
| 6-10 years (%)               | 6 (12)  |
| 11-15 years (%)              | 12 (24) |
| >16 years (%)                | 15 (30) |
| PLACE OF EMPLOYMENT N, %     |         |
| Acute Care                   | 26 (52) |
| Rehabilitation               | 24 (48) |
| EMPLOYMENT STATUS N, %       |         |
| Full-time                    | 39 (78) |
| Part-time                    | 11 (22) |
| EDUCATIONAL BACKGROUND N, %  |         |
| College                      | 9 (18)  |
| University                   | 24 (48) |
| Graduate school              | 17 (34) |

**Care Transitions Interventions Interview Guide—Patient and/or Caregiver**

1. Can you describe for me your experience of the transition from x to x?
  - a. *Who was involved in coordinating the care?*
  - b. *How were they involved coordinating and maintaining continuity of care across the care spectrum?*
  - c. *How were you informed of the transition?*
  - d. *Did you experience any difficulties in care? If YES: Can you describe for me the challenges you experienced?*
  - e. *What information around your care and/or transfer over and admission to x did you receive?*
2. Tell me (describe for me) how you/or your family caregiver were involved in forming a care transition plan that reflected your transfer.
3. Did you want to be more or less involved in the planning? Describe.
4. Tell me (describe for me) how you were involved in implementing the care transition plan.
5. Tell me (describe for me) how your unique needs were addressed.
6. Tell me (describe for me) how you were made aware of any follow-up medical appointments, follow-up care, and a post-discharge plan.
7. Tell me (describe for me) how any physical, health related, and/or social barriers to attending follow-up appointments were addressed?
8. Tell me (describe for me) how follow-up care was arranged for you.
9. Tell me (describe for me) how the nurse and/or members of the interprofessional care team informed you and/or your caregivers around your care transition.
10. Tell me (describe for me) how communication strategies with a nurse and/or other members of the health care team prepared you for your care transition.
11. Tell me (describe for me) how communication strategies with a nurse and/or other members of the health care team were used during the transition from hospital to rehab setting.
12. Tell me (describe for me) what patient education have you and/or your family/informal caregiver received.
13. Tell me (describe for me) about relevant community resources, services and programs you were made aware of during the transition period.

### Care Transitions Interventions Interview Guide—RN/Healthcare Disciplines

In addition to asking the following questions specific to the patient, study participants were also asked to describe their general practice.

1. Tell me (describe for me) the steps you are involved in relating to patient care transitions.
2. Tell me (describe for me) how patients and/or their caregiver were involved in developing a care transition plan of the transition from x to x.
3. Tell me (describe for me) how you were involved in implementing the care transition plan.
4. Tell me (describe for me) how patient and caregiver specific needs were addressed.
5. Tell me (describe for me) how you made the patient and caregiver aware of any follow-up medical appointments, follow-up care, and/or post-discharge plan.
6. Tell me how documentation tools are used during care transitions with accepting health care providers/care teams.
7. Tell me (describe for me) how you engage in communication strategies to prepare patients and caregivers for care transitions,
8. Tell me (describe for me) what patient and caregiver education and/or coaching you provided in the context of a transition in care.
9. Tell me (describe for me) how patient and caregiver education was delivered (mode of delivery).

## COREQ (COnsolidated criteria for REporting Qualitative research) Checklist

A checklist of items that should be included in reports of qualitative research. You must report the page number in your manuscript where you consider each of the items listed in this checklist. If you have not included this information, either revise your manuscript accordingly before submitting or note N/A.

| Topic                                          | Item No. | Guide Questions/Description                                                                                                                              | Reported on Page No. |
|------------------------------------------------|----------|----------------------------------------------------------------------------------------------------------------------------------------------------------|----------------------|
| <b>Domain 1: Research team and reflexivity</b> |          |                                                                                                                                                          |                      |
| <i>Personal characteristics</i>                |          |                                                                                                                                                          |                      |
| Interviewer/facilitator                        | 1        | Which author/s conducted the interview or focus group?                                                                                                   |                      |
| Credentials                                    | 2        | What were the researcher's credentials? E.g. PhD, MD                                                                                                     |                      |
| Occupation                                     | 3        | What was their occupation at the time of the study?                                                                                                      |                      |
| Gender                                         | 4        | Was the researcher male or female?                                                                                                                       |                      |
| Experience and training                        | 5        | What experience or training did the researcher have?                                                                                                     |                      |
| <i>Relationship with participants</i>          |          |                                                                                                                                                          |                      |
| Relationship established                       | 6        | Was a relationship established prior to study commencement?                                                                                              |                      |
| Participant knowledge of the interviewer       | 7        | What did the participants know about the researcher? e.g. personal goals, reasons for doing the research                                                 |                      |
| Interviewer characteristics                    | 8        | What characteristics were reported about the interviewer/facilitator? e.g. Bias, assumptions, reasons and interests in the research topic                |                      |
| <b>Domain 2: Study design</b>                  |          |                                                                                                                                                          |                      |
| <i>Theoretical framework</i>                   |          |                                                                                                                                                          |                      |
| Methodological orientation and Theory          | 9        | What methodological orientation was stated to underpin the study? e.g. grounded theory, discourse analysis, ethnography, phenomenology, content analysis |                      |
| <i>Participant selection</i>                   |          |                                                                                                                                                          |                      |
| Sampling                                       | 10       | How were participants selected? e.g. purposive, convenience, consecutive, snowball                                                                       |                      |
| Method of approach                             | 11       | How were participants approached? e.g. face-to-face, telephone, mail, email                                                                              |                      |
| Sample size                                    | 12       | How many participants were in the study?                                                                                                                 |                      |
| Non-participation                              | 13       | How many people refused to participate or dropped out? Reasons?                                                                                          |                      |
| <i>Setting</i>                                 |          |                                                                                                                                                          |                      |
| Setting of data collection                     | 14       | Where was the data collected? e.g. home, clinic, workplace                                                                                               |                      |
| Presence of non-participants                   | 15       | Was anyone else present besides the participants and researchers?                                                                                        |                      |
| Description of sample                          | 16       | What are the important characteristics of the sample? e.g. demographic data, date                                                                        |                      |
| <i>Data collection</i>                         |          |                                                                                                                                                          |                      |
| Interview guide                                | 17       | Were questions, prompts, guides provided by the authors? Was it pilot tested?                                                                            |                      |
| Repeat interviews                              | 18       | Were repeat interviews carried out? If yes, how many?                                                                                                    |                      |
| Audio/visual recording                         | 19       | Did the research use audio or visual recording to collect the data?                                                                                      |                      |
| Field notes                                    | 20       | Were field notes made during and/or after the interview or focus group?                                                                                  |                      |
| Duration                                       | 21       | What was the duration of the interviews or focus group?                                                                                                  |                      |
| Data saturation                                | 22       | Was data saturation discussed?                                                                                                                           |                      |
| Transcripts returned                           | 23       | Were transcripts returned to participants for comment and/or                                                                                             |                      |

| Topic                                  | Item No. | Guide Questions/Description                                                                                                        | Reported on Page No. |
|----------------------------------------|----------|------------------------------------------------------------------------------------------------------------------------------------|----------------------|
|                                        |          | correction?                                                                                                                        |                      |
| <b>Domain 3: analysis and findings</b> |          |                                                                                                                                    |                      |
| <i>Data analysis</i>                   |          |                                                                                                                                    |                      |
| Number of data coders                  | 24       | How many data coders coded the data?                                                                                               |                      |
| Description of the coding tree         | 25       | Did authors provide a description of the coding tree?                                                                              |                      |
| Derivation of themes                   | 26       | Were themes identified in advance or derived from the data?                                                                        |                      |
| Software                               | 27       | What software, if applicable, was used to manage the data?                                                                         |                      |
| Participant checking                   | 28       | Did participants provide feedback on the findings?                                                                                 |                      |
| <i>Reporting</i>                       |          |                                                                                                                                    |                      |
| Quotations presented                   | 29       | Were participant quotations presented to illustrate the themes/findings?<br>Was each quotation identified? e.g. participant number |                      |
| Data and findings consistent           | 30       | Was there consistency between the data presented and the findings?                                                                 |                      |
| Clarity of major themes                | 31       | Were major themes clearly presented in the findings?                                                                               |                      |
| Clarity of minor themes                | 32       | Is there a description of diverse cases or discussion of minor themes?                                                             |                      |

Developed from: Tong A, Sainsbury P, Craig J. Consolidated criteria for reporting qualitative research (COREQ): a 32-item checklist for interviews and focus groups. *International Journal for Quality in Health Care*. 2007. Volume 19, Number 6: pp. 349 – 357

**Once you have completed this checklist, please save a copy and upload it as part of your submission. DO NOT include this checklist as part of the main manuscript document. It must be uploaded as a separate file.**
