# Supplementary material for: Elucidating the information exchange during interfacility care transitions: Insights from a Qualitative Study
Source: PubMed Central journal article supplement — BMJ Open. 2017 Jul 12;7(7):e015400. doi: 10.1136/bmjopen-2016-015400 (PMC5734419; doi:10.1136/bmjopen-2016-015400), 2017-07-12
Supplement: bmjopen-2016-015400supp002.pdf [file bmjopen-2016-015400supp002.pdf]

## **Care Transitions Interventions Interview Guide—RN/Healthcare Disciplines**

In addition to asking the following questions specific to the patient, study participants were also asked to describe their general practice.

1. Tell me (describe for me) the steps you are involved in relating to patient care transitions.
2. Tell me (describe for me) how patients and/or their caregiver were involved in developing a care transition plan of the transition from x to x.
3. Tell me (describe for me) how you were involved in implementing the care transition plan.
4. Tell me (describe for me) how patient and caregiver specific needs were addressed.
5. Tell me (describe for me) how you made the patient and caregiver aware of any follow-up medical appointments, follow-up care, and/or post-discharge plan.
6. Tell me how documentation tools are used during care transitions with accepting health care providers/care teams.
7. Tell me (describe for me) how you engage in communication strategies to prepare patients and caregivers for care transitions,
8. Tell me (describe for me) what patient and caregiver education and/or coaching you provided in the context of a transition in care.
9. Tell me (describe for me) how patient and caregiver education was delivered (mode of delivery).
